# Supplementary material for: Amino Acids and IGF1 Regulation of Fish Muscle Growth Revealed by Transcriptome and microRNAome Integrative Analyses of Pacu (Piaractus mesopotamicus) Myotubes
Source: MDPI journal article supplement (doi:10.3390/ijms23031180), 2022-01-21
Supplement: s1 [file s1]

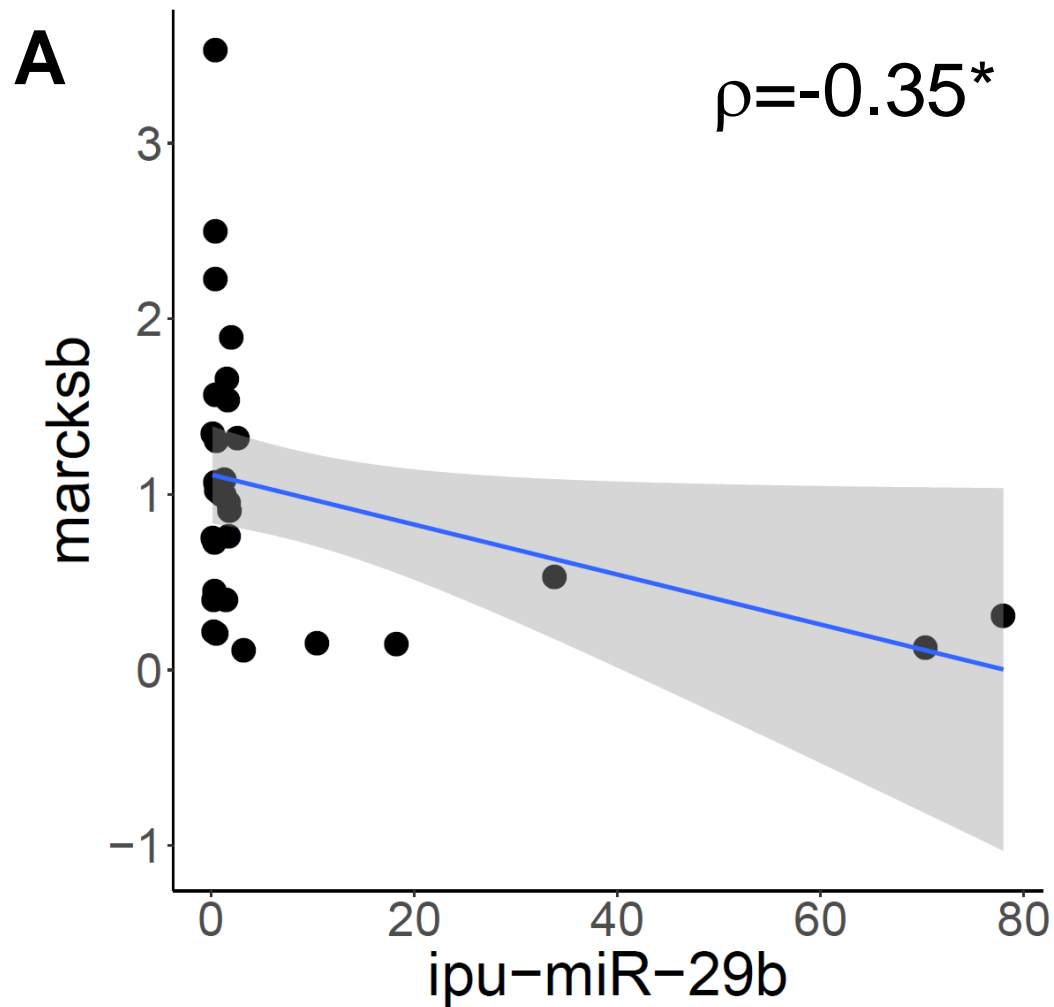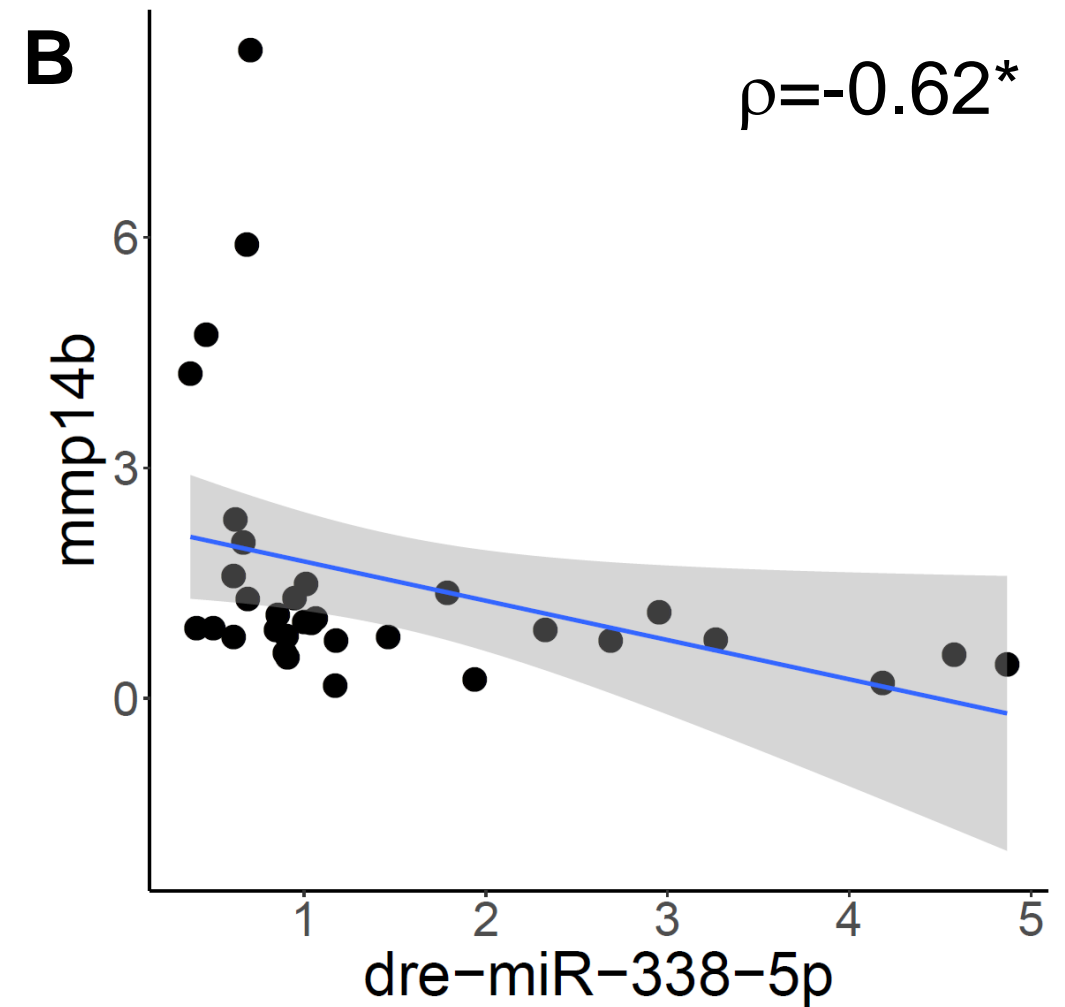

**Figure S6. Correlation of *marcksb/miR-29b* and *mmp14b/miR-338-5p* interactions.** Pearson correlation between fold-change values for *marcksb* vs *ipu-miR-29b* (A) and *mmp14b* vs *dre-miR-338-5p* (B). Pearson correlation ( $\rho$ ) index are indicated in the corners of the plot graphs, and asterisks indicate significant differences: \*:  $P < 0.05$ .
