# Supplementary material for: Amino Acids and IGF1 Regulation of Fish Muscle Growth Revealed by Transcriptome and microRNAome Integrative Analyses of Pacu (Piaractus mesopotamicus) Myotubes
Source: MDPI journal article supplement (doi:10.3390/ijms23031180), 2022-01-21
Supplement: s1 [file s1]

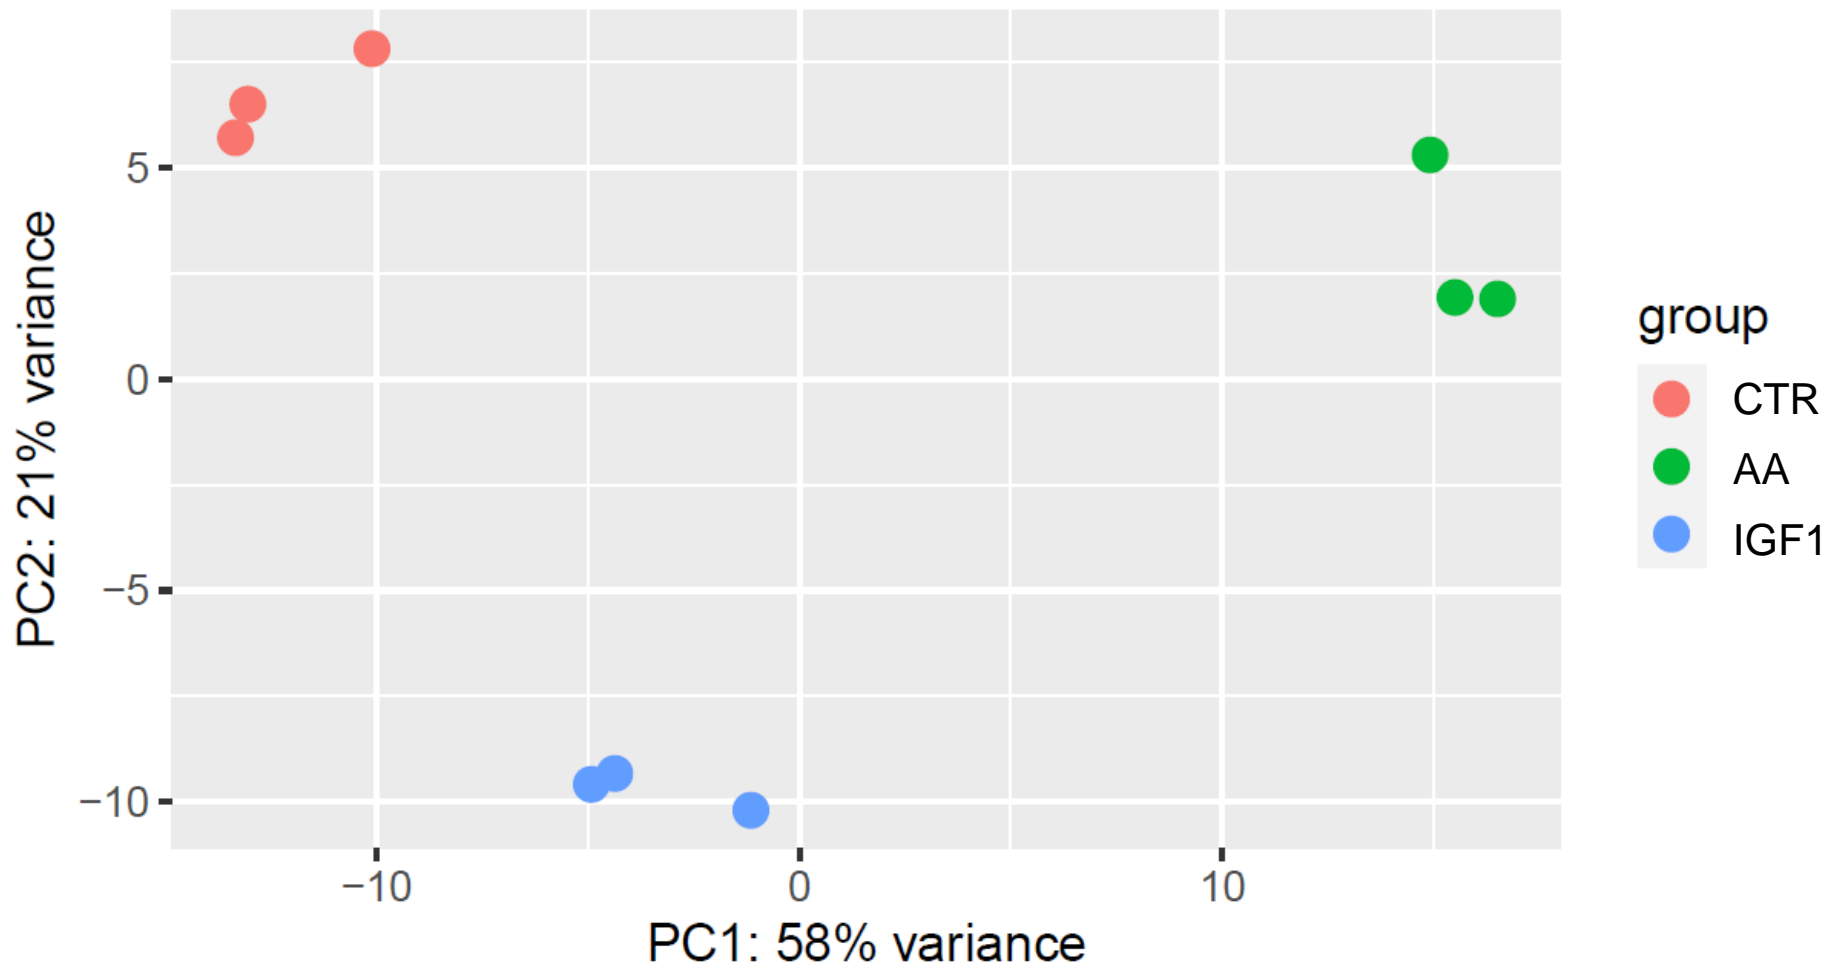

**Figure S1. Transcriptome principal component analysis (PCA) of pacu cultured myotubes in CTR, AA and IGF1 experimental groups.** PCA plot showing gene expression data grouped according to the CTR, AA and IGF1 treatments. Principal components were obtained using the log2 normalized counts for the genes in each sample.
