# Supplementary material for: Amino Acids and IGF1 Regulation of Fish Muscle Growth Revealed by Transcriptome and microRNAome Integrative Analyses of Pacu (Piaractus mesopotamicus) Myotubes
Source: MDPI journal article supplement (doi:10.3390/ijms23031180), 2022-01-21
Supplement: s1 [file s1]

**Table S5. Real time PCR primer sequences for genes and miRNAs.** Primers used for qPCR amplification of the *marcksb*, *mycn*, *mmp14b*, *fbxo25*, *tgfbr2*, *ipu-miR-29b* and *dre-miR-338-5p*. Primers were also designed for the reference genes *ppia*, *rpl13* and *U6 snRNA*.

| Gene                  | Primers (5' to 3')                                                                                                     |
|-----------------------|------------------------------------------------------------------------------------------------------------------------|
| <i>marcksb</i>        | F: CTCTTTCACCTCCCCAACAA<br>R: GTTGCGGATTGTGTGTTTTG                                                                     |
| <i>mycn</i>           | F: CTGTTGTGCTGGGACTGAGA<br>R: CAAACTCTTATGGCGGTGGT                                                                     |
| <i>mmp14b</i>         | F: AAGAACCCTCCCTCACCATC<br>R: CTCCGACTTTGCAGACATCA                                                                     |
| <i>tgfbr2</i>         | F: AGCTGCTGGGTATCTCTGGA<br>R: TCTATGGCTCTGGTGCTGTG                                                                     |
| <i>fbxo25</i>         | F: CGTAGGTGAAGTAGCCGCCA<br>R: GGAGAAGTCCAGCCTGTTGA                                                                     |
| <i>ppia</i>           | F: ATTGTGGTTCGTGAAGTCGC<br>R: CCGCTGGGCAGAGTGATTAT                                                                     |
| <i>rpl13</i>          | F: ATCAACAGGAAAGTAGCCC<br>R: AGGATGAGTTTGGAGCGGTA                                                                      |
| miRBase ID            | Mature sequence (5' to 3')                                                                                             |
| <i>ipu-miR-29b</i>    | GCUGAAUUCAGAUUGGUGCCAUAGA                                                                                              |
| <i>dre-miR-338-5p</i> | AACAAUAUCCUGGUGCUGCCUGAGU                                                                                              |
| <i>U6 snRNA</i>       | GTGCTCGCTTCGGCAGCACATATACTAAAATTG<br>GAACGATACAGAGAAGATTAGCATGGCCCCTG<br>CGCAAGGATGACACGCAAATTCGTGAAGCGTT<br>CCATATTTT |

*ipu*, *Ictalurus punctatus*; *dre*, *Danio rerio*; F, forward; R, reverse.
