# Supplementary material for: Amino Acids and IGF1 Regulation of Fish Muscle Growth Revealed by Transcriptome and microRNAome Integrative Analyses of Pacu (Piaractus mesopotamicus) Myotubes
Source: MDPI journal article supplement (doi:10.3390/ijms23031180), 2022-01-21
Supplement: s1 [file s1]

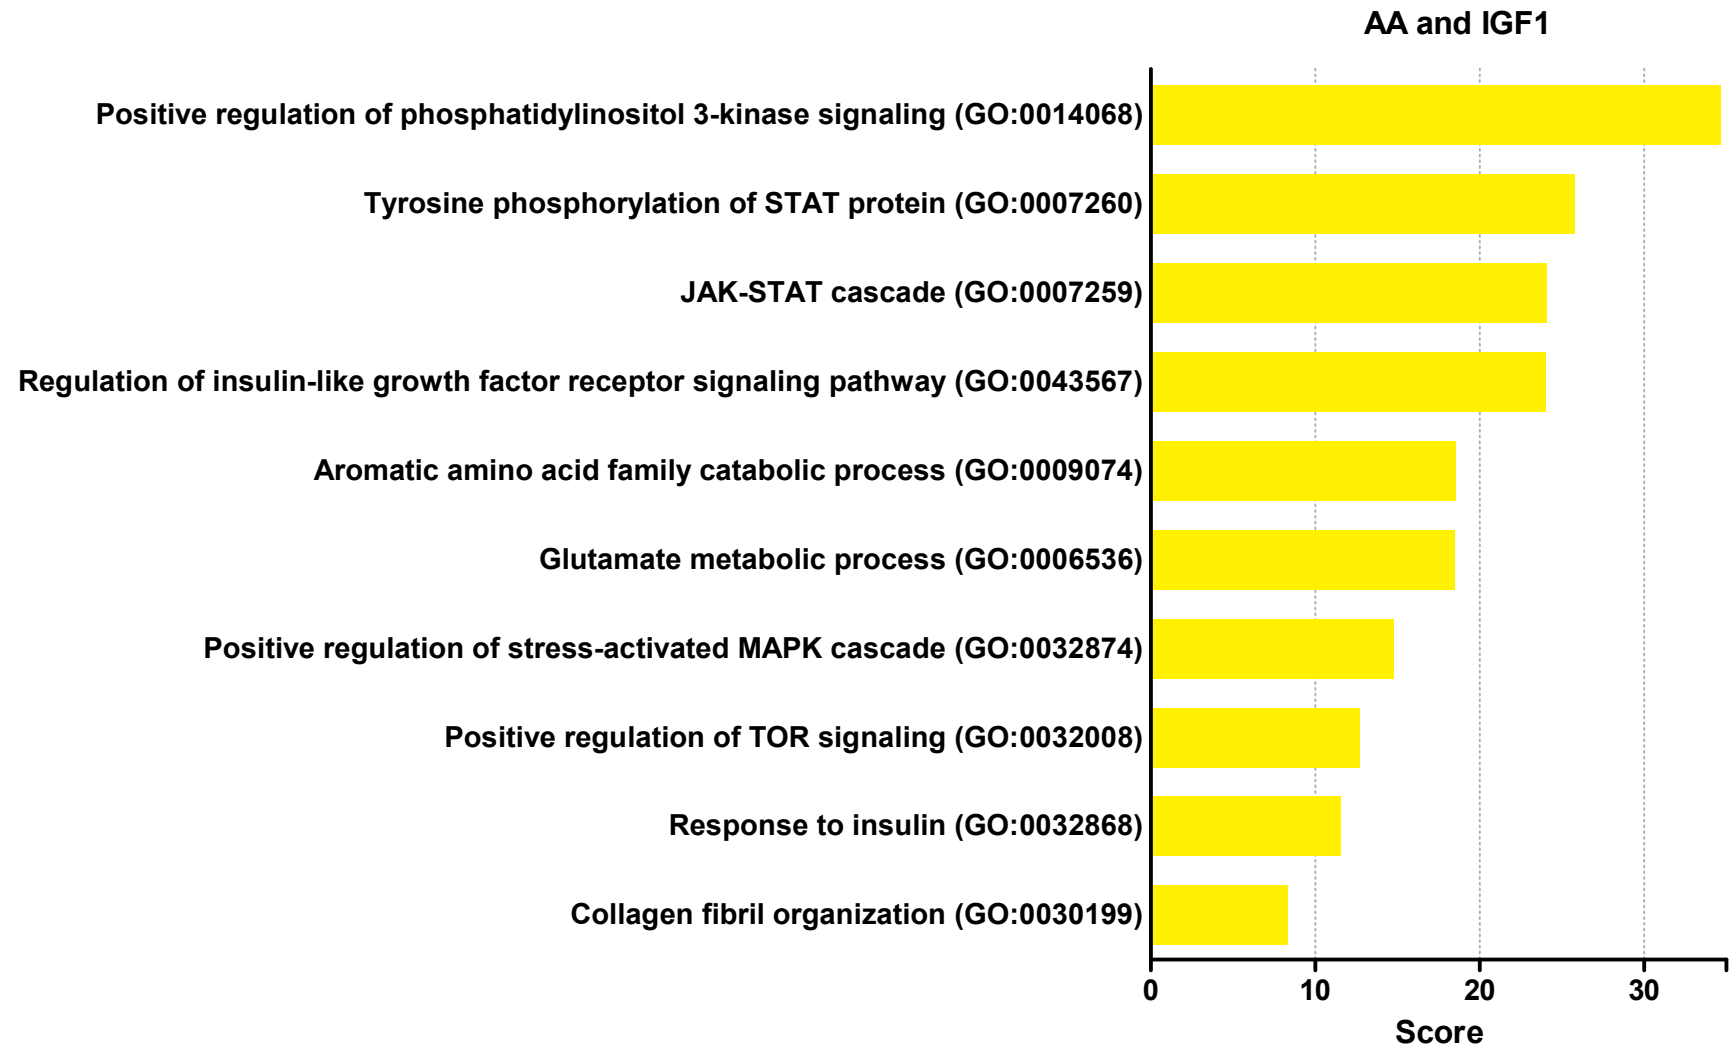

**Figure S2. Gene ontology enrichment analysis of genes differently expressed in both AA and IGF1 pacu cultured myotubes.** Biological processes were identified for common up- and down-regulated genes in both AA and IGF1 treatments compared to CTR group. Enrichment was defined as the 10 most significant terms according to the highest scores and P-values (<0.05).
