# Supplementary material for: Amino Acids and IGF1 Regulation of Fish Muscle Growth Revealed by Transcriptome and microRNAome Integrative Analyses of Pacu (Piaractus mesopotamicus) Myotubes
Source: MDPI journal article supplement (doi:10.3390/ijms23031180), 2022-01-21
Supplement: s1 [file s1]

**Table S1.** Transcriptome and microRNAome metrics of cultured myotubes from pacu (*Piaractus mesopotamicus*).

| Transcriptome Parameters       | CTR        | AA                | IGF1               |
|--------------------------------|------------|-------------------|--------------------|
| Reads                          | 70,363,951 | 69,999,996        | 76,376,683         |
| Filtered reads                 | 11,555,143 | 4,342,856         | 15,004,925         |
| Contigs                        | 176,103    |                   |                    |
| Annotated contigs              | 69,932     |                   |                    |
| Normalized contigs             | 35,576     |                   |                    |
| Differentially expressed genes | -----      | AA vs CTR<br>1228 | IGF1 vs CTR<br>534 |
| Enriched pathways              | 143        |                   |                    |

CTR: Control Group; AA: amino acid Group; IGF1: IGF1 Group.

| MicroRNAome Parameters          | CTR        | AA              | IGF1             |
|---------------------------------|------------|-----------------|------------------|
| Reads                           | 40,147,542 | 40,557,507      | 44,512,081       |
| Filtered reads                  | 39,319,324 | 39,554,091      | 43,712,749       |
| Annotated miRNAs                | 3,579      |                 |                  |
| Normalized miRNAs               | 1,769      |                 |                  |
| Differentially expressed miRNAs | -----      | AA vs CTR<br>11 | IGF1 vs CTR<br>8 |

CTR: Control Group; AA: amino acid Group; IGF1: IGF1 Group.
