# Supplementary material for: Amino Acids and IGF1 Regulation of Fish Muscle Growth Revealed by Transcriptome and microRNAome Integrative Analyses of Pacu (Piaractus mesopotamicus) Myotubes
Source: MDPI journal article supplement (doi:10.3390/ijms23031180), 2022-01-21
Supplement: s1 [file s1]

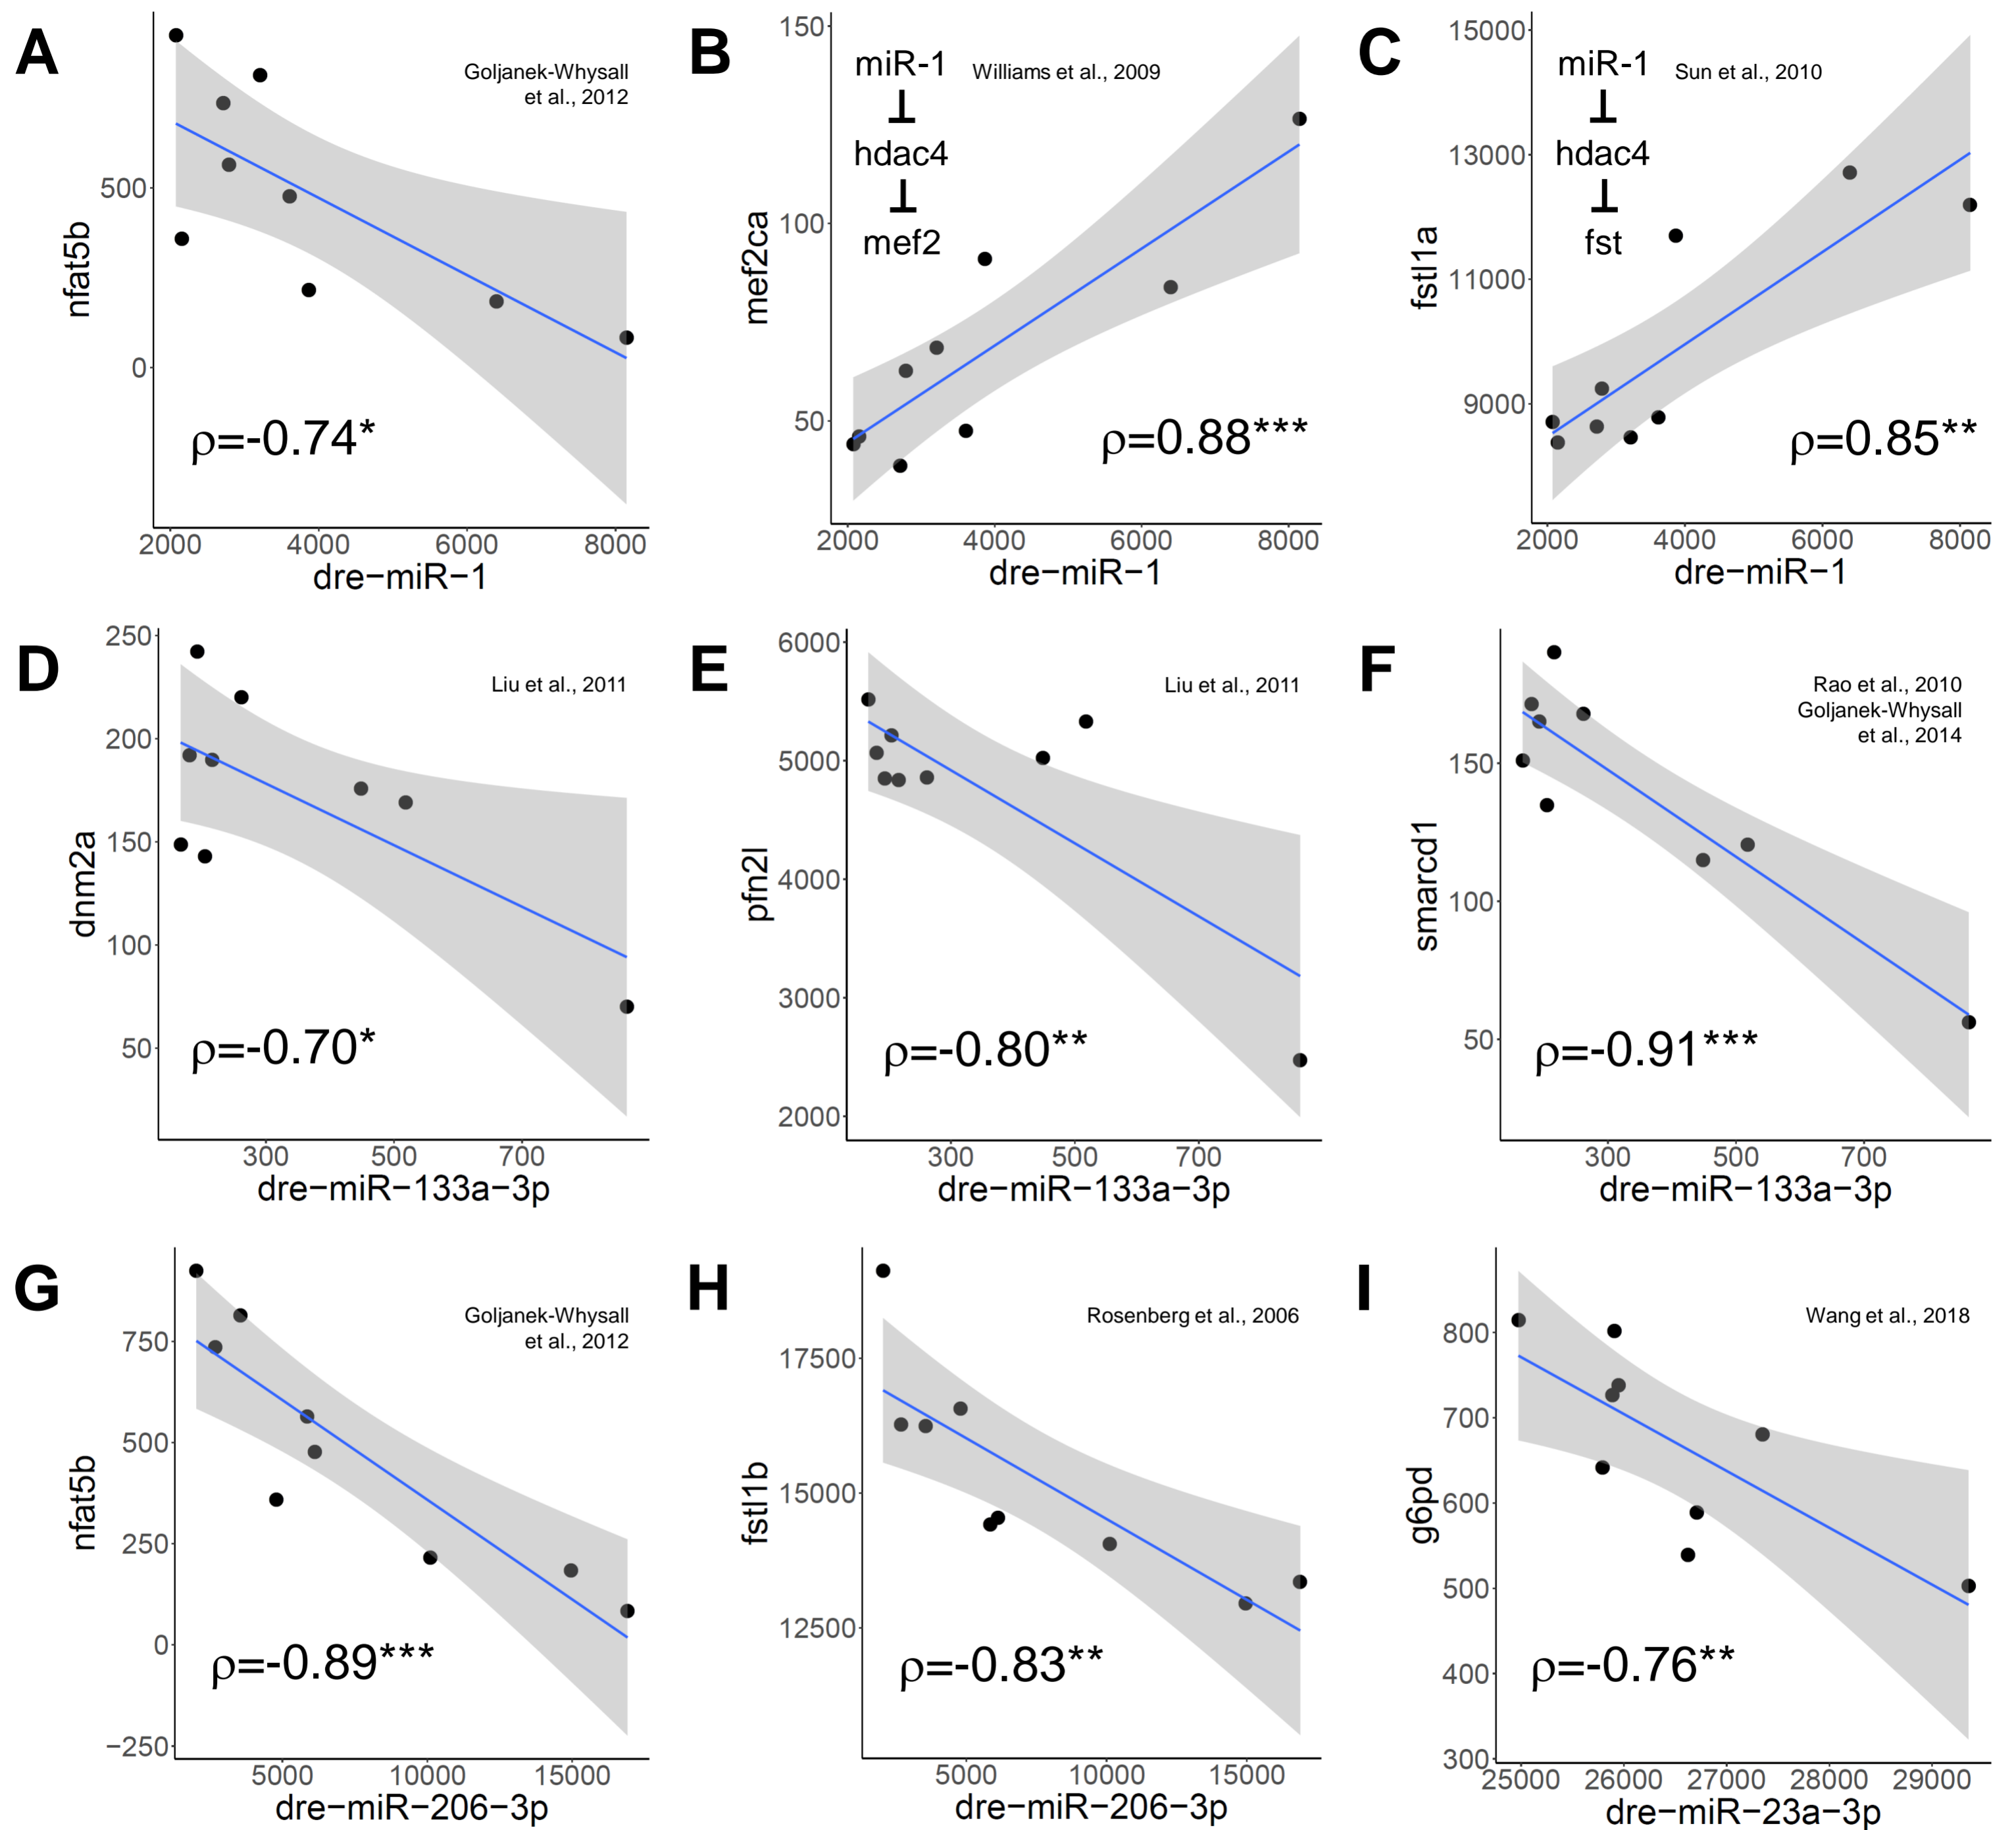

**Figure S5. Correlation of validated miRNA-target interaction.** Pearson correlation between number of counts for *nfat5b* vs *dre-miR-1* (A), *mef2c* vs *dre-miR-1* (B), *fstl1a* vs *dre-miR-1* (C), *dnm2a* vs *dre-miR-133a-3p* (D), *pfn2l* vs *dre-miR-133a-3p* (E), *smarcd1* vs *dre-miR-133a-3p* (F), *nfat5b* vs *dre-miR-206* (G), *fstl1b* vs *dre-miR-206* (H) and *g6pd* vs *dre-miR-23a* (I). Pearson correlation ( $\rho$ ) index are indicated in the corners of the plot graphs, and asterisks indicate significant differences between groups: \*:  $P < 0.05$ ; \*\*:  $P < 0.01$ ; \*\*\*:  $P < 0.001$ .
